# Supplementary material
Source: Springer Nature journal article supplement (https://www.springermedizin.de/resource/supplementary/12943_2013_1250_MOESM3_ESM.pdf/9553056)

### Additional file 3

Correlation between the H3K9ac or E2F1 enrichment, and +182 site methylation or DNMT1 expression in BRCA1-mutated breast cancer and their adjacent normal breast tissues

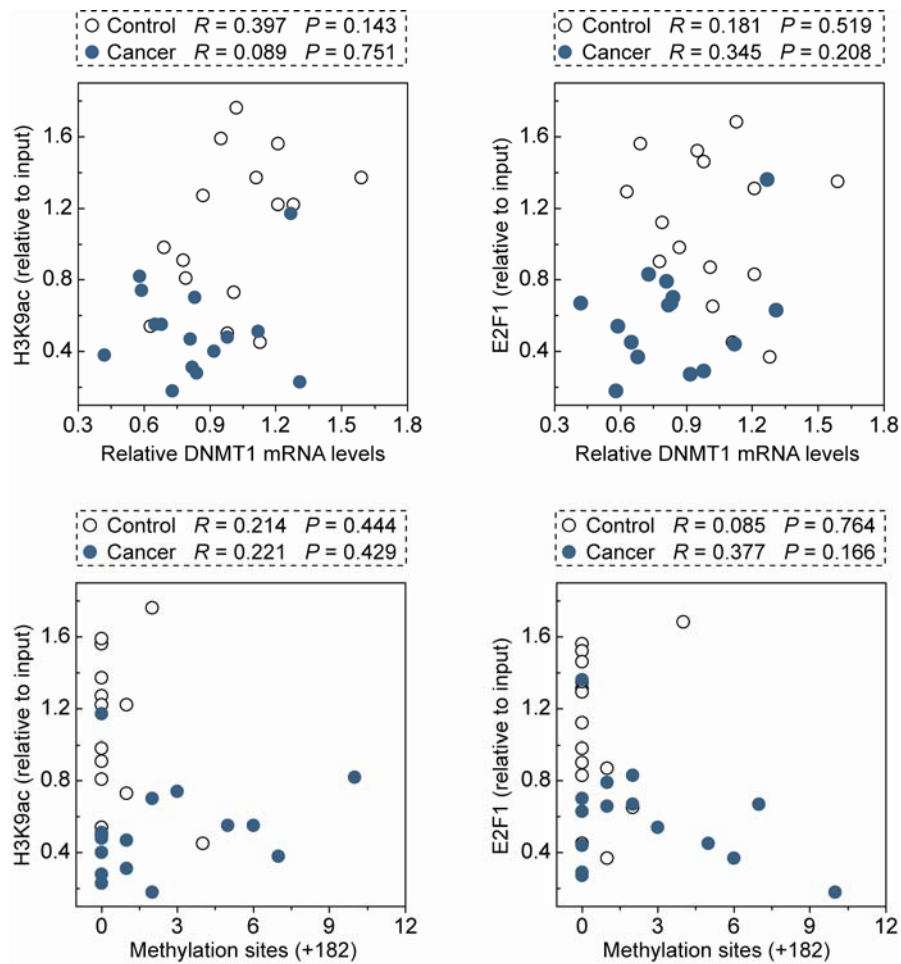

Supplement: MOESM3 [file 9553056]
